# **Effect of disclosing a polygenic risk score for coronary heart disease on adverse cardiovascular events: 10-year follow-up of the MI-GENES randomized clinical trial**

**Running title: A 10-y follow-up of the MI-GENES trial**

**Authors:**

Mohammadreza Naderian, MD, MPH<sup>1</sup>; Marwan E. Hamed, MD<sup>1</sup>; Ali A. Vaseem<sup>1</sup>; Kristjan Norland, MS<sup>1</sup>; Ozan Dikilitas, MD<sup>2</sup>; Azin Teymourzadeh, MD, MPH<sup>1</sup>; Kent R. Bailey, PhD<sup>3</sup>; Iftikhar J. Kullo MD <sup>\*1,4</sup>

**Authors' Affiliation:**

<sup>1</sup> Department of Cardiovascular Medicine, Mayo Clinic, Rochester, MN, USA

<sup>2</sup> Department of Internal Medicine, Mayo Clinic, Rochester, MN, USA

<sup>3</sup> Department of Quantitative Health Sciences, Mayo Clinic, Rochester, Minnesota

<sup>4</sup> Gonda Vascular Center, Mayo Clinic, Rochester, MN, USA

**\*Corresponding Author:**

Iftikhar J. Kullo, MD

Department of Cardiovascular Medicine and the Gonda Vascular Center, Mayo Clinic

200 First Street SW, Rochester, MN 55905.

Phone: 507-284-2511

Email: [kullo.iftikhar@mayo.edu](mailto:kullo.iftikhar@mayo.edu)

Twitter: @iftikhar\_kullo

## **Abstract**

**Background:** The MI-GENES clinical trial (NCT01936675), in which participants at intermediate risk of coronary heart disease (CHD) were randomized to receive a Framingham risk score (FRS<sub>g</sub>, n=103), or an integrated risk score (IRS<sub>g</sub>, n=104) that additionally included a polygenic risk score (PRS), demonstrated that after 6 months, participants randomized to IRS<sub>g</sub> had higher statin initiation and lower low-density lipoprotein cholesterol (LDL-C).

**Objectives:** In a post hoc 10-year follow-up analysis of the MI-GENES trial, we investigated whether disclosure of a PRS for CHD was associated with a reduction in adverse cardiovascular events.

**Methods:** Participants were followed from randomization beginning in October 2013 until September 2023 to ascertain adverse cardiovascular events, testing for CHD, and changes in risk factors, by blinded review of electronic health records. The primary outcome was the time from randomization to the occurrence of the first major adverse cardiovascular event (MACE), defined as cardiovascular death, non-fatal myocardial infarction, coronary revascularization, and non-fatal stroke. Statistical analyses were conducted using Cox proportional hazards regression and linear mixed-effects models.

**Results:** We followed all 203 participants who completed the MI-GENES trial, 100 in FRS<sub>g</sub> and 103 in IRS<sub>g</sub> (mean age at the end of follow-up: 68.2±5.2, 48% male). During a median follow-up of 9.5 years, 9 MACEs occurred in FRS<sub>g</sub> and 2 in IRS<sub>g</sub> (hazard ratio (HR), 0.20; 95% confidence interval (CI), 0.04 to 0.94; *P*=0.042). In FRS<sub>g</sub>, 47 (47%) underwent at least one test for CHD, compared to 30 (29%) in IRS<sub>g</sub> (HR, 0.51; 95% CI, 0.32 to 0.81; *P*=0.004). IRS<sub>g</sub> participants had a longer duration of statin therapy during the first four years post-randomization and a greater reduction in LDL-C for up to 3 years post-randomization. No significant differences between the two groups were observed for hemoglobin A1C, systolic and diastolic blood pressures, weight, and smoking cessation rate during follow-up.

**Conclusions:** The disclosure of an IRS that included a PRS to individuals at intermediate risk for CHD was associated with a lower incidence of MACE after a decade of follow-up, likely due to a higher rate of initiation and longer duration of statin therapy, leading to lower LDL-C levels.

**Keywords:** Genetic Risk Score, Statin, Hydroxymethylglutaryl-CoA Reductase Inhibitors, Primary Prevention, Coronary Artery Disease, Risk Assessment

## Introduction

Genome-wide association analyses have identified numerous loci associated with coronary heart disease (CHD).<sup>1-3</sup> The aggregation of risk alleles at these loci into a polygenic risk score (PRS) provides a quantitative measure of genetic susceptibility,<sup>4-7</sup> which can be integrated with other clinical and lifestyle risk factors to provide a more accurate estimate of an individual's risk.<sup>5,8-13</sup> There is great interest in using PRS for CHD in the clinical setting but little data is available regarding whether such use reduces adverse cardiovascular events.<sup>14</sup> Prior observational studies suggest that individuals at high polygenic risk for CHD have greater benefit from preventive measures than individuals at low or intermediate polygenic risk.<sup>15-17</sup>

The MI-GENES trial (NCT01936675)<sup>18,19</sup> was a randomized clinical trial (RCT) designed to assess the impact of disclosing a PRS for CHD, in addition to a conventional risk score based on the Framingham equation,<sup>20</sup> on low-density lipoprotein cholesterol (LDL-C) levels. The design of the MI-GENES trial and the results have been previously published.<sup>18,19</sup> The study recruited and randomized 207 non-Hispanic white participants (age 45-75 years, mean age at randomization: 59.4±5.1 years, 47% male) from Olmsted County, Minnesota, without known atherosclerotic cardiovascular disease (ASCVD), at intermediate risk for CHD (10-year risk: 5-20%), and not on statin treatment. Participants were randomized into a Framingham risk score group (FRS<sub>g</sub>, n=103; receiving their 10-year risk of CHD based on Framingham risk score), and an integrated risk score group (IRS<sub>g</sub>, n=104; who received PRS information in addition to the Framingham risk score). A genetic counselor disclosed the risk, followed by shared decision-making regarding statin therapy with a physician. Six months after randomization, participants in FRS<sub>g</sub> also received their PRS for CHD via mailed letters.

Conducting a RCT to assess the long-term impact of PRS-guided prevention on adverse cardiovascular events is challenging because of the logistical burden and cost of such a study. To begin to address this knowledge gap, we undertook a 10-year follow-up study of the MI-GENES cohort to investigate whether disclosure of IRS was associated with a lower adverse cardiovascular event rate than disclosure of FRS alone and whether any differences in adverse cardiovascular events could be explained by changes in risk factors during follow-up. The long-term follow-up of the MI-

GENES cohort was feasible because participants were residents of Olmsted County, Minnesota and obtained care at Mayo Clinic Rochester or the Mayo Clinic Health System.

## **Methods**

### **Data Source**

The follow-up duration in our study spanned from the beginning of randomization in October 2013 until the end of September 2023. The electronic health record (EHR) data from the Mayo Clinic Health System was reviewed to ascertain adverse cardiovascular events, testing for CHD, and changes in CHD risk factors during the follow-up period. We followed the “REporting of studies Conducted using Observational Routinely-collected Data” (RECORD) guideline for standardized reporting of data in the MI-GENES follow-up study (eTable 1 in Supplement).<sup>21</sup> We updated some of the terms used in the original trial to align with current standards (eTable 2 in Supplement). The protocol for the follow-up of MI-GENES participants was approved by the Institutional Review Board of Mayo Clinic, Rochester, Minnesota (IRB#: 23-004831).

### **Outcome Definition**

#### **Ascertainment and adjudication of major adverse cardiovascular event**

The primary outcome of the follow-up study was defined as the time from randomization in the MI-GENES trial to the occurrence of the first adjudicated major adverse cardiovascular event (MACE), defined as cardiovascular death, non-fatal myocardial infarction (MI), coronary revascularization, and non-fatal stroke. Detailed definitions for each component of MACE are provided in eMethod 1 in Supplement.

Any possible MACE within the defined follow-up timeframe was initially ascertained by a manual EHR data review by two of the authors (MN, MEH), blinded to the initial randomization of participants (Figure 1). To harmonize the manual chart review process, each author first independently reviewed EHR data for 20 distinct participants and compared findings to resolve any conflicts. Following this initial phase, both physicians independently reviewed EHR data of each enrolled participant, ensuring consistency in case ascertainment.

In addition to manual EHR data review, we also ascertained cardiovascular events by automated EHR data pull, using a set of International Classification of Diseases (ICD-9 and ICD-10) codes related to adverse cardiovascular events, as well as Current Procedural Terminology (CPT) codes for event-related procedures (detailed information on the ICD and CPT codes is presented in eTable 3 and eTable 4 in Supplement). After comparing the MACE identified through manual EHR data review with those detected through automated EHR data pull, a 2<sup>nd</sup> round of manual EHR data review was conducted if the findings were discordant. Subsequently, the identified possible MACE underwent a blinded adjudication process. This multi-step approach ensured the accuracy and reliability of the extracted data for case adjudication and analysis.

For each MACE, a comprehensive review of the participant's medical history, symptoms, physical examination findings at the time of presentation, diagnostic tests during clinical assessment, and final diagnosis, along with subsequent medical treatment was undertaken. All possible MACE underwent final adjudication by a cardiologist, who was also blinded to the initial randomization. The final adjudication of each MACE was based on predefined criteria (eMethod 1 in Supplement). In instances where multiple possible MACE were reported for a participant, each event was presented separately to the adjudicator, and the earliest definite event was considered as the MACE for that participant.

### **Stress testing and coronary artery imaging**

In addition to assessing differences in MACE, we investigated the time from randomization to the first instance of testing for the diagnosis of CHD with or without non-fatal MI or coronary revascularization (eMethod 1 in Supplement). These tests for CHD encompassed stress testing and coronary artery imaging. To accomplish this, we again conducted a blinded manual EHR data review and complementary automated EHR data pull using CPT codes (eTable 4 in Supplement).

### **CHD risk factor comparison**

In addition to MACE, stress testing, and coronary artery imaging, we assessed differences in CHD risk factors as a potential explanation for any observed differences in MACE. We used Logical Observation Identifiers Names and Codes (LOINC) to extract data on lipid profiles and hemoglobin

A1C measurements from EHR (detailed information on LOINC in eTable 5 in Supplement). We collected data for lipid profiles from the 3-month mark after baseline and excluded post-MACE lipid profiles to only capture the effect of statins in the primary prevention setting, avoiding the confounding effect of low LDL-C and non-high-density lipoprotein cholesterol (non-HDL-C) levels attributable to statin use for secondary prevention. Additionally, we obtained available data on systolic and diastolic blood pressures (SBP and DBP), weight, and smoking cessation during the defined follow-up period.

### **Statin use**

Utilizing RxNorm codes for statins, we extracted all the statin orders for MI-GENES participants to analyze the trend and differences in statin therapy between two groups (detailed information on the RxNorm codes is in eTable 6 in Supplement). To assess statin intensification and de-escalation over the follow-up period, we used accepted definitions of statin intensity.<sup>22</sup> We used the start and end dates of each statin order to determine the number of participants on statin therapy at various time points during follow-up.

### **Statistical analyses**

The primary outcome – time from randomization to the first MACE – was assessed using the Cox proportional hazards model. We also used Cox model to analyze time to testing for CHD. Given the randomized design of the original MI-GENES trial, Cox models were not further adjusted for other potential confounding covariates. Linear mixed-effects models were fitted to compare covariates with multiple measurements during the follow-up period between randomization groups. These covariates included LDL-C, non-HDL-C, triglyceride, hemoglobin A1C, SBP, DBP, and weight. The fixed effects included in the model were the group randomization, time difference from randomization, and their interaction, along with the baseline measurement of the covariate. Additionally, we included each participant as a random intercept to capture individual variability in multiple measured covariates. We also assessed and confirmed that the assumptions of the linear mixed-effects model were met. To compare discrete variables between the two groups, we used the chi-squared test and Fisher's exact test. Wilcoxon's rank test and t-test were applied to compare non-normally distributed continuous covariates and normally distributed covariates, respectively. All tests were two-sided, and statistical

significance was determined at  $P < 0.05$ . All statistical analyses were performed using R (version 4.3.1, R Foundation for Statistical Computing).

## Results

### Participants characteristics

Four enrolled participants withdrew from the MI-GENES clinical trial after randomization (3 in FRS<sub>g</sub> and 1 in IRS<sub>g</sub>). The remaining 203 participants (100 in FRS<sub>g</sub> and 103 in IRS<sub>g</sub>) were followed up. The mean age at the end of follow-up was  $68.2 \pm 5.2$  years. There was no loss to follow-up, and the duration of follow-up was similar between two groups. The last residential address for 95.6% of participants was in the state of Minnesota, similar in both groups (eTable 7 in Supplement).

### MACE during follow-up

During the follow-up period, there was 1 (1%) cardiovascular death and 4 (4%) non-fatal strokes in FRS<sub>g</sub>, with no corresponding events in IRS<sub>g</sub>. Non-fatal MI occurred in 4 (4%) FRS<sub>g</sub> participants and 1 (1%) IRS<sub>g</sub> participants. There was one coronary revascularization (percutaneous coronary intervention) which occurred in IRS<sub>g</sub> (eTable 8 in Supplement). In total, 9 (9%) MACE occurred in FRS<sub>g</sub> and 2 (2%) MACE occurred in IRS<sub>g</sub> (hazard ratio (HR), 0.20; 95% confidence interval (CI), 0.04 to 0.94;  $P = 0.042$ ) (Figure 2). Based on the rate of incident MACE in FRS<sub>g</sub> and IRS<sub>g</sub>, 14 individuals (95% CI, 0 to 53) need to be disclosed their risk with a PRS to prevent one MACE over 10 years (eTable 9 in Supplement).

### Testing for CHD during follow-up

In FRS<sub>g</sub>, 47 (47%) underwent at least one test for CHD, compared to 30 (29%) in IRS<sub>g</sub> ( $P = 0.009$ ). The most common tests were stress echocardiography, followed by coronary artery calcium scanning, and exercise ECG. The Cox model showed a HR of 0.51 (95% CI, 0.32 to 0.81) for cumulative proportion of participants in IRS<sub>g</sub> compared to FRS<sub>g</sub> who underwent testing for CHD ( $P = 0.004$ ) (Table 1, eFigure 1, eTable 10 in Supplement). Of participants who underwent stress testing during the follow-up period, 7 (15%) in FRS<sub>g</sub> and none of the IRS<sub>g</sub> participants were detected to have myocardial ischemia ( $P = 0.037$ ) (Table 1, eTable 10 in Supplement). FRS<sub>g</sub> participants tended to undergo coronary angiography more often than IRS<sub>g</sub> (9 (9%) vs. 3 (3%);  $P = 0.079$ ). Of the 12

coronary angiography procedures performed, 6 (50%) were reported as non-obstructive, 3 (25%) as single-vessel disease, and 2 (17%) and 1 (8%) as two-vessel disease and left-main-three-vessel disease, respectively (Table 1, eTable 10 in Supplement).

### **Lipid profiles during follow-up**

The frequency of lipid profile measurements during the follow-up period was similar between two groups (eTable 7 in Supplement). As reported in the original MI-GENES paper, LDL-C levels were significantly lower in IRS<sub>g</sub> at 6 months post-randomization and in our follow-up analyses, the differences remained significant for up to 3 years (Figure 3 - top panel, eTable 11 in Supplement). Additionally, individuals in IRS<sub>g</sub> showed greater reductions in non-HDL-C and triglyceride levels compared to those in the FRS<sub>g</sub> for up to 4- and 2.5-years post-randomization, respectively (Figure 3 - middle and bottom panels, eTable 11 in Supplement).

### **Statin therapy during follow-up**

During the initial four years post-randomization, a higher proportion of participants in IRS<sub>g</sub> were taking statins than in FRS<sub>g</sub>. This proportion gradually declined and eventually reached a level similar to that of FRS<sub>g</sub> four years after randomization (Figure 4, eFigure 2 in Supplement). No significant differences were observed between the two groups regarding low and high-intensity statins; however, during the initial four years post-randomization, a higher proportion of participants in IRS<sub>g</sub> were taking medium-intensity statins than in FRS<sub>g</sub> (Figure 4, eFigure 2 in Supplement).

### **Trajectories of other CHD risk factors during follow-up**

The frequency of hemoglobin A1C, SBP, DBP and weight measurements during the follow-up period was similar between two groups (eTable 7 in Supplement). No significant differences were observed in mean hemoglobin A1C levels, mean SBP and DBP levels, and mean weight between the two groups throughout the follow-up period (eFigure 3, eTable 12 in Supplement). Three of the six participants in the IRS<sub>g</sub> identified as current smokers at randomization, quit smoking during the follow-up period, whereas among the six participants in the FRS<sub>g</sub> identified as current smokers at randomization, only one quit smoking (eFigure 4 in Supplement).



## Discussion

In this 10-year follow-up study of the MI-GENES clinical trial, we observed a lower incidence of MACE (cardiovascular death, non-fatal MI, coronary revascularization, and non-fatal stroke) in those randomized to disclosure of an IRS (comprising both PRS and FRS) vs. FRS alone. Additionally, the disclosure of IRS was associated with a lower rate of testing for CHD, suggesting lower incidence of CHD symptoms. In the original report of the MI-GENES clinical trial, disclosure of IRS for CHD compared to FRS alone, led to a higher rate of statin therapy and reductions in LDL-C levels, at 6-months following disclosure. During the 10-y follow-up, individuals who received IRS were on statin for a longer duration, leading to more durable reductions in LDL-C levels than in the control group (FRS<sub>g</sub>). A lower cumulative LDL-C exposure due to earlier statin initiation and longer duration of statin therapy could be one reason for the lower rate of MACE in IRS<sub>g</sub>.

The MI-GENES cohort was relatively small and limited to participants at intermediate risk for CHD (10-y risk: 5-20%) resulting in a modest number of MACE. The differences in MACE, mean LDL-C levels, and statin use duration were significant, but should be interpreted with caution given the modest sample size and the limited number of events, which is also reflected in the relatively wide confidence intervals. One cannot exclude the possibility that the results are due to chance. However, lower cumulative LDL-C exposure and lower rate of new CHD symptoms and detectable ischemia in stress testing in the IRS<sub>g</sub> increase confidence that the finding of lower MACE in IRS<sub>g</sub> is a true effect. Larger clinical trials, nonetheless, are needed to confirm these findings.

Cumulative LDL-C exposure over time is associated with increase in cardiovascular risk, underscoring the importance of earlier LDL-C control for prevention.<sup>23</sup> In several clinical trials, earlier initiation of statins, the use of higher statin intensity, and more prolonged duration of statin therapy were associated with improved cardiovascular outcomes i.e. a 'legacy effect'.<sup>24-26</sup> The significantly higher proportion of statin prescription and therapy during the follow-up period in the IRS<sub>g</sub> was mostly due to greater use of medium intensity statins. The differences, however, were noted only in the initial half of the follow-up. In part this was due to later discontinuation of statins possibly

because of perceived adequate LDL-C reduction in the primary prevention setting or higher reported side effects by IRS<sub>g</sub> participants (Figure 4, eFigure 2 in Supplement).

An analysis of the motivation, perception, and treatment beliefs of the MI-GENES participants indicated that those who received IRS at the time of randomization had a stronger desire to improve their health.<sup>27</sup> Additionally, they had higher perceived personal control, reflecting their belief in being able to alter their situation by bringing about desirable change through cognitive, behavioral, and decisional control.<sup>28</sup> While we were not able to capture longitudinal data on lifestyle modifications to assess long-term behavioral changes between the FRS<sub>g</sub> and IRS<sub>g</sub>, difference in perceived personal control shortly post-randomization raises the possibility that some of the difference in MACE between the two groups could have resulted from favorable lifestyle modifications in IRS<sub>g</sub> during the follow up period. Disclosure of an IRS was also associated with increased information seeking and information sharing behaviors, particularly with family members, friends, coworkers, and primary care providers.<sup>29</sup> Such behavior may have led to increased knowledge about risk factors for CHD and motivation to control these as well as seek continuity of care with their care provider.<sup>29</sup>

### **Strengths and limitations**

This follow-up study of the MI-GENES trial participants provides for the first-time data on long-term outcomes of PRS-guided prevention for ASCVD. Remarkably, follow-up was possible in >95% of the initially enrolled participants, primarily because they continued to reside in Minnesota and receive care at the Mayo Clinic or one of the regional Mayo Clinic Health System centers. Thus we had access to comprehensive data with minimal loss to follow-up over 10 years. In addition, we performed a multistep blinded process for both manual and automated data extraction from EHR to ensure accurate ascertainment of MACE and testing for CHD.

We acknowledge several limitations of our study, including a relatively small sample size limited to participants at intermediate risk for CHD (5-20%) resulting in a modest number of incident MACE. Because the MI-GENES trial was designed before availability of the pooled cohort equations,<sup>30</sup> the Framingham risk score was used to estimate 10-y CHD risk. The PRS utilized in the MI-GENES trial was computed from 28 SNVs. As of 2013, ~ 50 SNVs had been identified as

genome-wide significant, and 22 SNVs in risk factor pathways (lipid, blood pressure, and diabetes mellitus) were excluded from the PRS used in the MI-GENES trial. Additionally, lack of diversity in the study cohort limits the generalizability of the findings to other racial/ethnic groups. The study was conducted at an academic medical center, CHD risk was disclosed by a genetic counselor followed by shared decision-making with physicians in the Cardiovascular Health Clinic. Such implementation may be challenging to replicate in primary care practice and low resource centers and additional studies are needed in diverse settings in the United States.

### **Conclusion**

In this 10-year follow-up study of the MI-GENES trial, disclosure of an integrated CHD risk score that included a PRS, to individuals at intermediate risk of CHD, was associated with a lower incidence of MACE. A higher rate of early initiation of statins, longer duration of statin therapy and lower LDL-C levels during the first four years after disclosure of an integrated CHD risk, likely contributed to this effect. In addition, those receiving an integrated CHD risk underwent testing for CHD less frequently, suggestive of a lower incidence of CHD symptoms. The results of this study motivate larger RCTs that enroll from diverse practice settings to confirm our findings.

### **Disclosure of Interest**

The authors declare no conflict of interest.

### **Data Availability Statement**

The dataset generated and analyzed for the current study is available from the corresponding author on reasonable request that might be necessary to interpret, replicate, and build upon the methods or findings reported.

### **Funding**

The MIGENES clinical trial was conducted as a genomic medicine implementation study during phase II of the eMERGE Network and was supported by grant U01HG006379 from the National Human Genome Research Institute (NHGRI) and by the Mayo Center for Individualized Medicine. Follow-up was enabled by funding for phase IV of the eMERGE Network.

## References

1. Tcheandjieu C, Zhu X, Hilliard AT, et al. Large-scale genome-wide association study of coronary artery disease in genetically diverse populations. *Nature Medicine*. 2022/08/01 2022;28(8):1679-1692. doi:10.1038/s41591-022-01891-3
2. Ding K, Kullo IJ. Genome-Wide Association Studies for Atherosclerotic Vascular Disease and Its Risk Factors. *Circulation: Cardiovascular Genetics*. 2009;2(1):63-72. doi:10.1161/CIRCGENETICS.108.816751
3. Hindy G, Aragam KG, Ng K, et al. Genome-Wide Polygenic Score, Clinical Risk Factors, and Long-Term Trajectories of Coronary Artery Disease. *Arteriosclerosis, Thrombosis, and Vascular Biology*. 2020;40(11):2738-2746. doi:10.1161/ATVBAHA.120.314856
4. Dikilitas O, Schaid DJ, Tcheandjieu C, Clarke SL, Assimes TL, Kullo IJ. Use of Polygenic Risk Scores for Coronary Heart Disease in Ancestrally Diverse Populations. *Curr Cardiol Rep*. Sep 2022;24(9):1169-1177. doi:10.1007/s11886-022-01734-0
5. Patel AP, Wang M, Ruan Y, et al. A multi-ancestry polygenic risk score improves risk prediction for coronary artery disease. *Nature Medicine*. 2023/07/01 2023;29(7):1793-1803. doi:10.1038/s41591-023-02429-x
6. Groenendyk JW, Greenland P, Khan SS. Incremental Value of Polygenic Risk Scores in Primary Prevention of Coronary Heart Disease: A Review. *JAMA Internal Medicine*. 2022;182(10):1082-1088. doi:10.1001/jamainternmed.2022.3171
7. Smith JL, Schaid DJ, Kullo IJ. Implementing Reporting Standards for Polygenic Risk Scores for Atherosclerotic Cardiovascular Disease. *Curr Atheroscler Rep*. Jun 2023;25(6):323-330. doi:10.1007/s11883-023-01104-3
8. Elliott J, Bodinier B, Bond TA, et al. Predictive Accuracy of a Polygenic Risk Score–Enhanced Prediction Model vs a Clinical Risk Score for Coronary Artery Disease. *JAMA*. 2020;323(7):636-645. doi:10.1001/jama.2019.22241
9. Mosley JD, Gupta DK, Tan J, et al. Predictive Accuracy of a Polygenic Risk Score Compared With a Clinical Risk Score for Incident Coronary Heart Disease. *JAMA*. 2020;323(7):627-635. doi:10.1001/jama.2019.21782
10. Saadatagah S, Naderian M, Dikilitas O, Hamed ME, Bangash H, Kullo IJ. Polygenic Risk, Rare Variants, and Family History. *JACC: Advances*. 2023;2(7):100567. doi:10.1016/j.jacadv.2023.100567
11. Ding K, Bailey KR, Kullo IJ. Genotype-informed estimation of risk of coronary heart disease based on genome-wide association data linked to the electronic medical record. *BMC Cardiovascular Disorders*. 2011/11/03 2011;11(1):66. doi:10.1186/1471-2261-11-66
12. Kullo IJ, Lewis CM, Inouye M, Martin AR, Ripatti S, Chatterjee N. Polygenic scores in biomedical research. *Nature Reviews Genetics*. 2022/09/01 2022;23(9):524-532. doi:10.1038/s41576-022-00470-z
13. Norland K, Schaid DJ, Naderian M, Na J, Kullo IJ. Joint Association of Polygenic Risk and Social Determinants of Health with Coronary Heart Disease in the United States. *medRxiv*. 2024:2024.01.10.24301105. doi:10.1101/2024.01.10.24301105
14. O’Sullivan JW, Raghavan S, Marquez-Luna C, et al. Polygenic Risk Scores for Cardiovascular Disease: A Scientific Statement From the American Heart Association. *Circulation*. 2022;146(8):e93-e118. doi:10.1161/CIR.0000000000001077
15. Khera AV, Emdin CA, Drake I, et al. Genetic Risk, Adherence to a Healthy Lifestyle, and Coronary Disease. *New England Journal of Medicine*. 2016;375(24):2349-2358. doi:10.1056/NEJMoa1605086
16. Mega JL, Stitzel NO, Smith JG, et al. Genetic risk, coronary heart disease events, and the clinical benefit of statin therapy: an analysis of primary and secondary prevention trials. *The Lancet*. 2015;385(9984):2264-2271. doi:10.1016/S0140-6736(14)61730-X
17. Natarajan P, Young R, Stitzel NO, et al. Polygenic Risk Score Identifies Subgroup With Higher Burden of Atherosclerosis and Greater Relative Benefit From Statin Therapy in the Primary Prevention Setting. *Circulation*. May 30 2017;135(22):2091-2101. doi:10.1161/circulationaha.116.024436

18. Kullo IJ, Jouni H, Olson JE, Montori VM, Bailey KR. Design of a randomized controlled trial of disclosing genomic risk of coronary heart disease: the Myocardial Infarction Genes (MI-GENES) study. *BMC Med Genomics*. Aug 15 2015;8:51. doi:10.1186/s12920-015-0122-0
19. Kullo IJ, Jouni H, Austin EE, et al. Incorporating a Genetic Risk Score Into Coronary Heart Disease Risk Estimates: Effect on Low-Density Lipoprotein Cholesterol Levels (the MI-GENES Clinical Trial). *Circulation*. Mar 22 2016;133(12):1181-8. doi:10.1161/circulationaha.115.020109
20. Wilson PW, D'Agostino RB, Levy D, Belanger AM, Silbershatz H, Kannel WB. Prediction of coronary heart disease using risk factor categories. *Circulation*. May 12 1998;97(18):1837-47. doi:10.1161/01.cir.97.18.1837
21. Benchimol EI, Smeeth L, Guttman A, et al. The REporting of studies Conducted using Observational Routinely-collected health Data (RECORD) statement. *PLoS Med*. Oct 2015;12(10):e1001885. doi:10.1371/journal.pmed.1001885
22. Grundy SM, Stone NJ, Bailey AL, et al. 2018 AHA/ACC/AACVPR/AAPA/ABC/ACPM/ADA/AGS/APhA/ASPC/NLA/PCNA Guideline on the Management of Blood Cholesterol: A Report of the American College of Cardiology/American Heart Association Task Force on Clinical Practice Guidelines. *Circulation*. 2019;139(25):e1082-e1143. doi:10.1161/CIR.0000000000000625
23. Domanski MJ, Tian X, Wu CO, et al. Time Course of LDL Cholesterol Exposure and Cardiovascular Disease Event Risk. *Journal of the American College of Cardiology*. 2020;76(13):1507-1516. doi:10.1016/j.jacc.2020.07.059
24. Baigent C, Blackwell L, Emberson J, et al. Efficacy and safety of more intensive lowering of LDL cholesterol: a meta-analysis of data from 170,000 participants in 26 randomised trials. *Lancet*. Nov 13 2010;376(9753):1670-81. doi:10.1016/s0140-6736(10)61350-5
25. Mihaylova B, Emberson J, Blackwell L, et al. The effects of lowering LDL cholesterol with statin therapy in people at low risk of vascular disease: meta-analysis of individual data from 27 randomised trials. *Lancet*. Aug 11 2012;380(9841):581-90. doi:10.1016/s0140-6736(12)60367-5
26. In Sun R, Jooyoung C, Joung Sik S, et al. Association between CVDs and initiation and adherence to statin treatment in patients with newly diagnosed hypercholesterolaemia: a retrospective cohort study. *BMJ Open*. 2021;11(4):e045375. doi:10.1136/bmjopen-2020-045375
27. Kattel S, Onyekwelu T, Brown S-A, Jouni H, Austin E, Kullo IJ. Motivation, Perception, and Treatment Beliefs in the Myocardial Infarction Genes (MI-GENES) Randomized Clinical Trial. *Journal of Genetic Counseling*. 2017/10/01 2017;26(5):1153-1161. doi:https://doi.org/10.1007/s10897-017-0092-9
28. Robinson CL, Jouni H, Kruisselbrink TM, et al. Disclosing genetic risk for coronary heart disease: effects on perceived personal control and genetic counseling satisfaction. *Clin Genet*. Feb 2016;89(2):251-7. doi:10.1111/cge.12577
29. Brown S-AN, Jouni H, Marroush TS, Kullo IJ. Effect of Disclosing Genetic Risk for Coronary Heart Disease on Information Seeking and Sharing. *Circulation: Cardiovascular Genetics*. 2017;10(4):e001613. doi:10.1161/CIRCGENETICS.116.001613
30. Stone NJ, Robinson JG, Lichtenstein AH, et al. 2013 ACC/AHA Guideline on the Treatment of Blood Cholesterol to Reduce Atherosclerotic Cardiovascular Risk in Adults. *Circulation*. 2014;129(25\_suppl\_2):S1-S45. doi:10.1161/01.cir.0000437738.63853.7a

## Figure Legends

### Figure 1: Flow Diagram of the MI-GENES Clinical Trial and the MI-GENES Follow-up Study

Abbreviations: CPT: Current Procedural Terminology, EHR: electronic health records, FRS<sub>g</sub>: Framingham risk score group, ICD: International Classification of Diseases, IRS<sub>g</sub>: integrated risk score group, LDL-C: low-density lipoprotein cholesterol, LOINC: Logical Observation Identifiers Names and Codes, MACE: major adverse cardiovascular event, PRS: polygenic risk score

### Figure 2: Kaplan-Meier Graph Comparing MACE Free Survival in FRS<sub>g</sub> and IRS<sub>g</sub> over the Follow-up Period

Abbreviations: CI: confidence interval, FRS<sub>g</sub>: Framingham risk score group, IRS<sub>g</sub>: integrated risk score group, HR: hazard ratio, MACE: major adverse cardiovascular event

### Figure 3: Predicted LDL-C, Non-HDL-C, and Triglyceride Levels Over 10 Years of Follow-up

Predicted mean LDL-C (top panel), non-HDL-C (middle panel), and triglyceride (bottom panel) levels from randomization to the end of follow-up period, utilizing a locally weighted scatterplot smoothing (LOESS) model on actual data. The solid lines represent the predicted mean values, while the shaded regions indicate the corresponding 95% confidence intervals. Estimated differences for these measurements using linear mixed-effects models are provided in eTable 11 in Supplement.

Abbreviations: FRS<sub>g</sub>: Framingham risk score group, IRS<sub>g</sub>: integrated risk score group, LDL-C: low-density lipoprotein cholesterol, Non-HDL-C: non-high-density lipoprotein cholesterol

### Figure 4: Proportion of Participants on Statin Therapy in FRS<sub>g</sub> and IRS<sub>g</sub> over 10 Years of Follow-up

This figure shows the proportion of participants in FRS<sub>g</sub> (left panel) and IRS<sub>g</sub> (right panel) who were taking low-intensity (dotted dashed lines), medium-intensity (dashed lines), high-intensity (dotted lines), and any types of statins (thick solid lines), during 10-year follow-up period.

Abbreviations: FRS<sub>g</sub>: Framingham risk score group, IRS<sub>g</sub>: integrated risk score group

## Tables

**Table 1:** Stress Testing and Coronary Artery Imaging During Follow-Up of MI-GENES Participants

|                                                                           | <b>FRS<sub>g</sub></b><br><b>(n=100)</b> | <b>IRS<sub>g</sub></b><br><b>(n=103)</b> |
|---------------------------------------------------------------------------|------------------------------------------|------------------------------------------|
| Participants with at least one test for CHD during follow-up <sup>a</sup> | 47 (47%)                                 | 30 (29%)                                 |
| Exercise ECG                                                              | 13                                       | 10                                       |
| Nuclear perfusion imaging                                                 | 5                                        | 6                                        |
| Stress echocardiography                                                   | 23                                       | 11                                       |
| CAC scan                                                                  | 18                                       | 11                                       |
| Coronary CT angiography                                                   | 4                                        | 7                                        |
| Coronary angiography                                                      | 9                                        | 3                                        |
| Participants with proven ischemia on a stress test <sup>b, c</sup>        | 7 (15%)                                  | 0 (0%)                                   |

<sup>a</sup> The numbers might overlap for testings for CHD as some participants underwent >1 stress testing or coronary artery imaging.

<sup>b</sup> Percentages have been reported based on the number of participants with at least one testing for CHD during follow-up.

<sup>c</sup> For some participants who tested positive in stress testing (exercise ECG, nuclear perfusion imaging, and stress echocardiography) subsequent coronary artery imaging via coronary CT angiography or coronary angiography did not indicate ischemia.

Abbreviation: CAC: Coronary Artery Calcium, CT: Computed Tomography, ECG: Electrocardiogram, FRS<sub>g</sub>: Framingham risk score group, IRS<sub>g</sub>: integrated risk score group

**MI-GENES  
clinical trial**

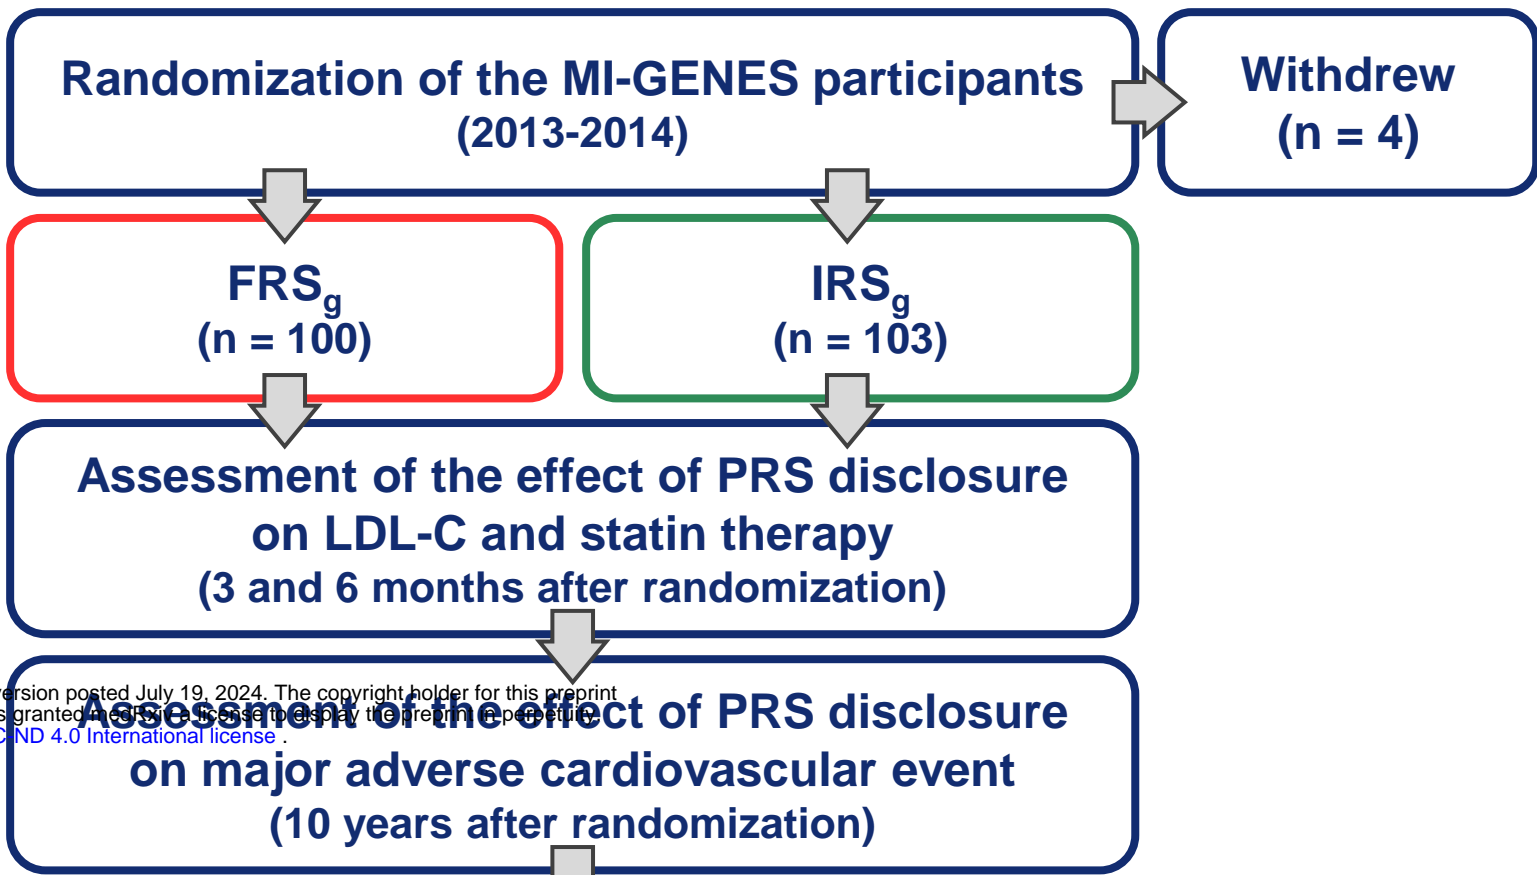

**MI-GENES  
follow-up study**

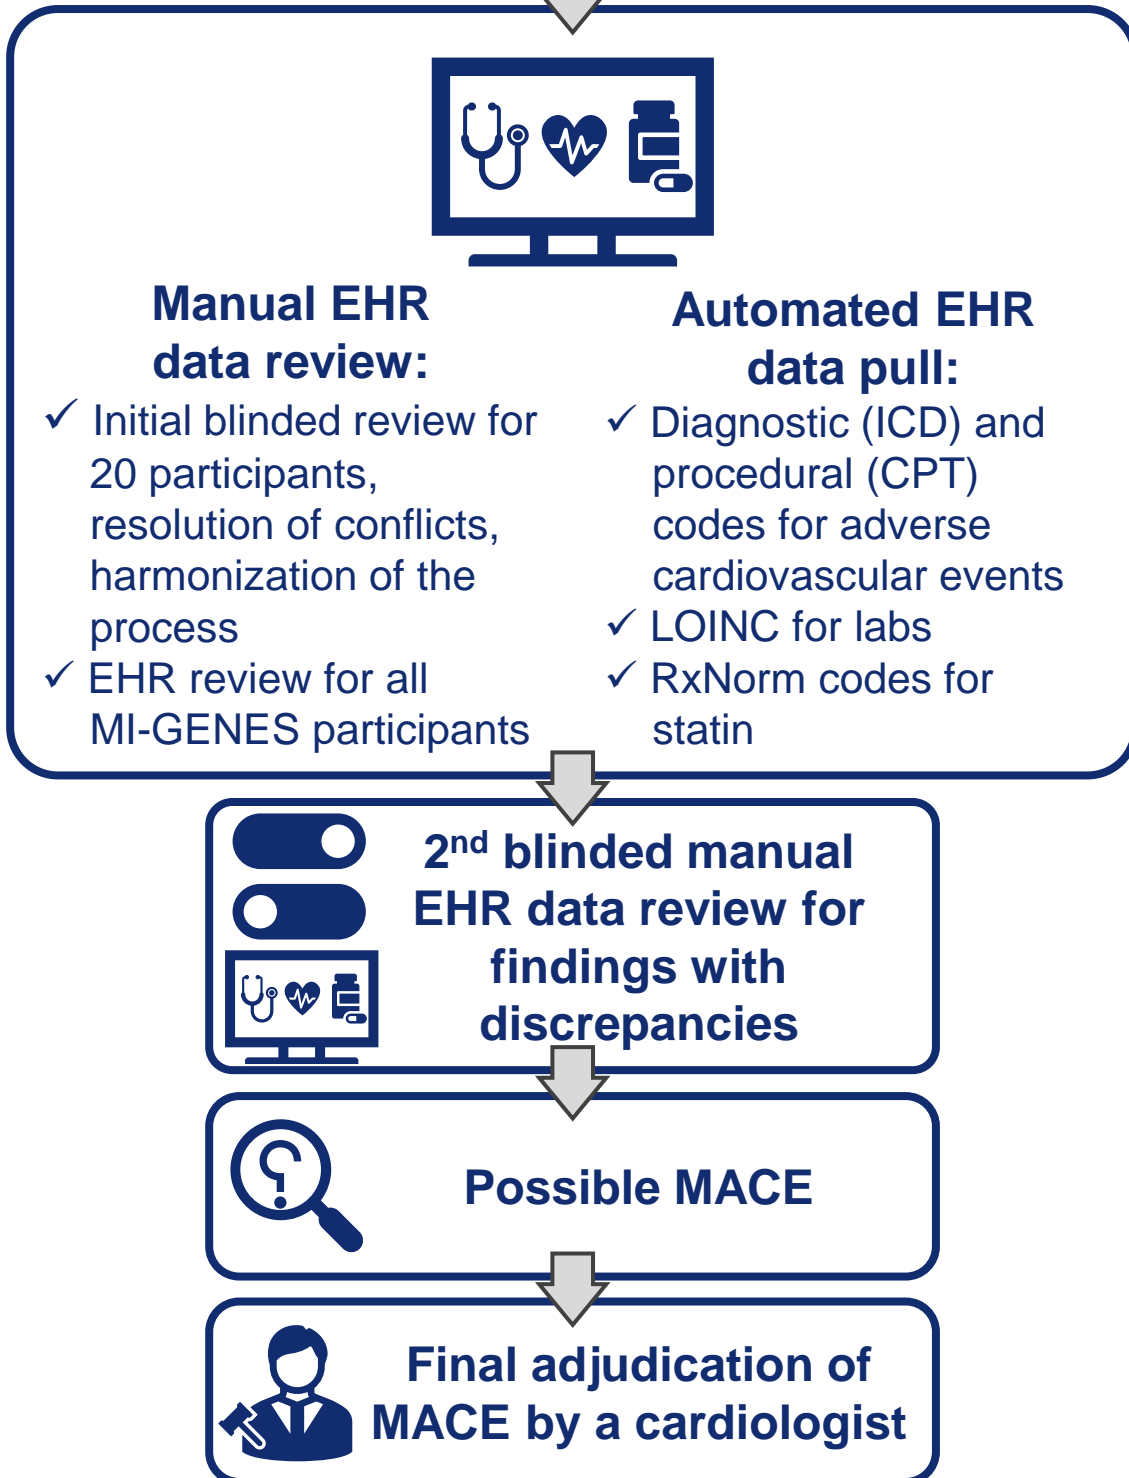

4.07.19.24310709; this version posted July 19, 2024. The copyright holder for this preprint (which was not certified by peer review) is the author/funder, who has granted bioRxiv a license to display the preprint in perpetuity. It is made available under a [CC-BY-NC-ND 4.0 International license](https://creativecommons.org/licenses/by-nc-nd/4.0/).



Study groups: ■ FRS<sub>g</sub> ■ IRS<sub>g</sub>

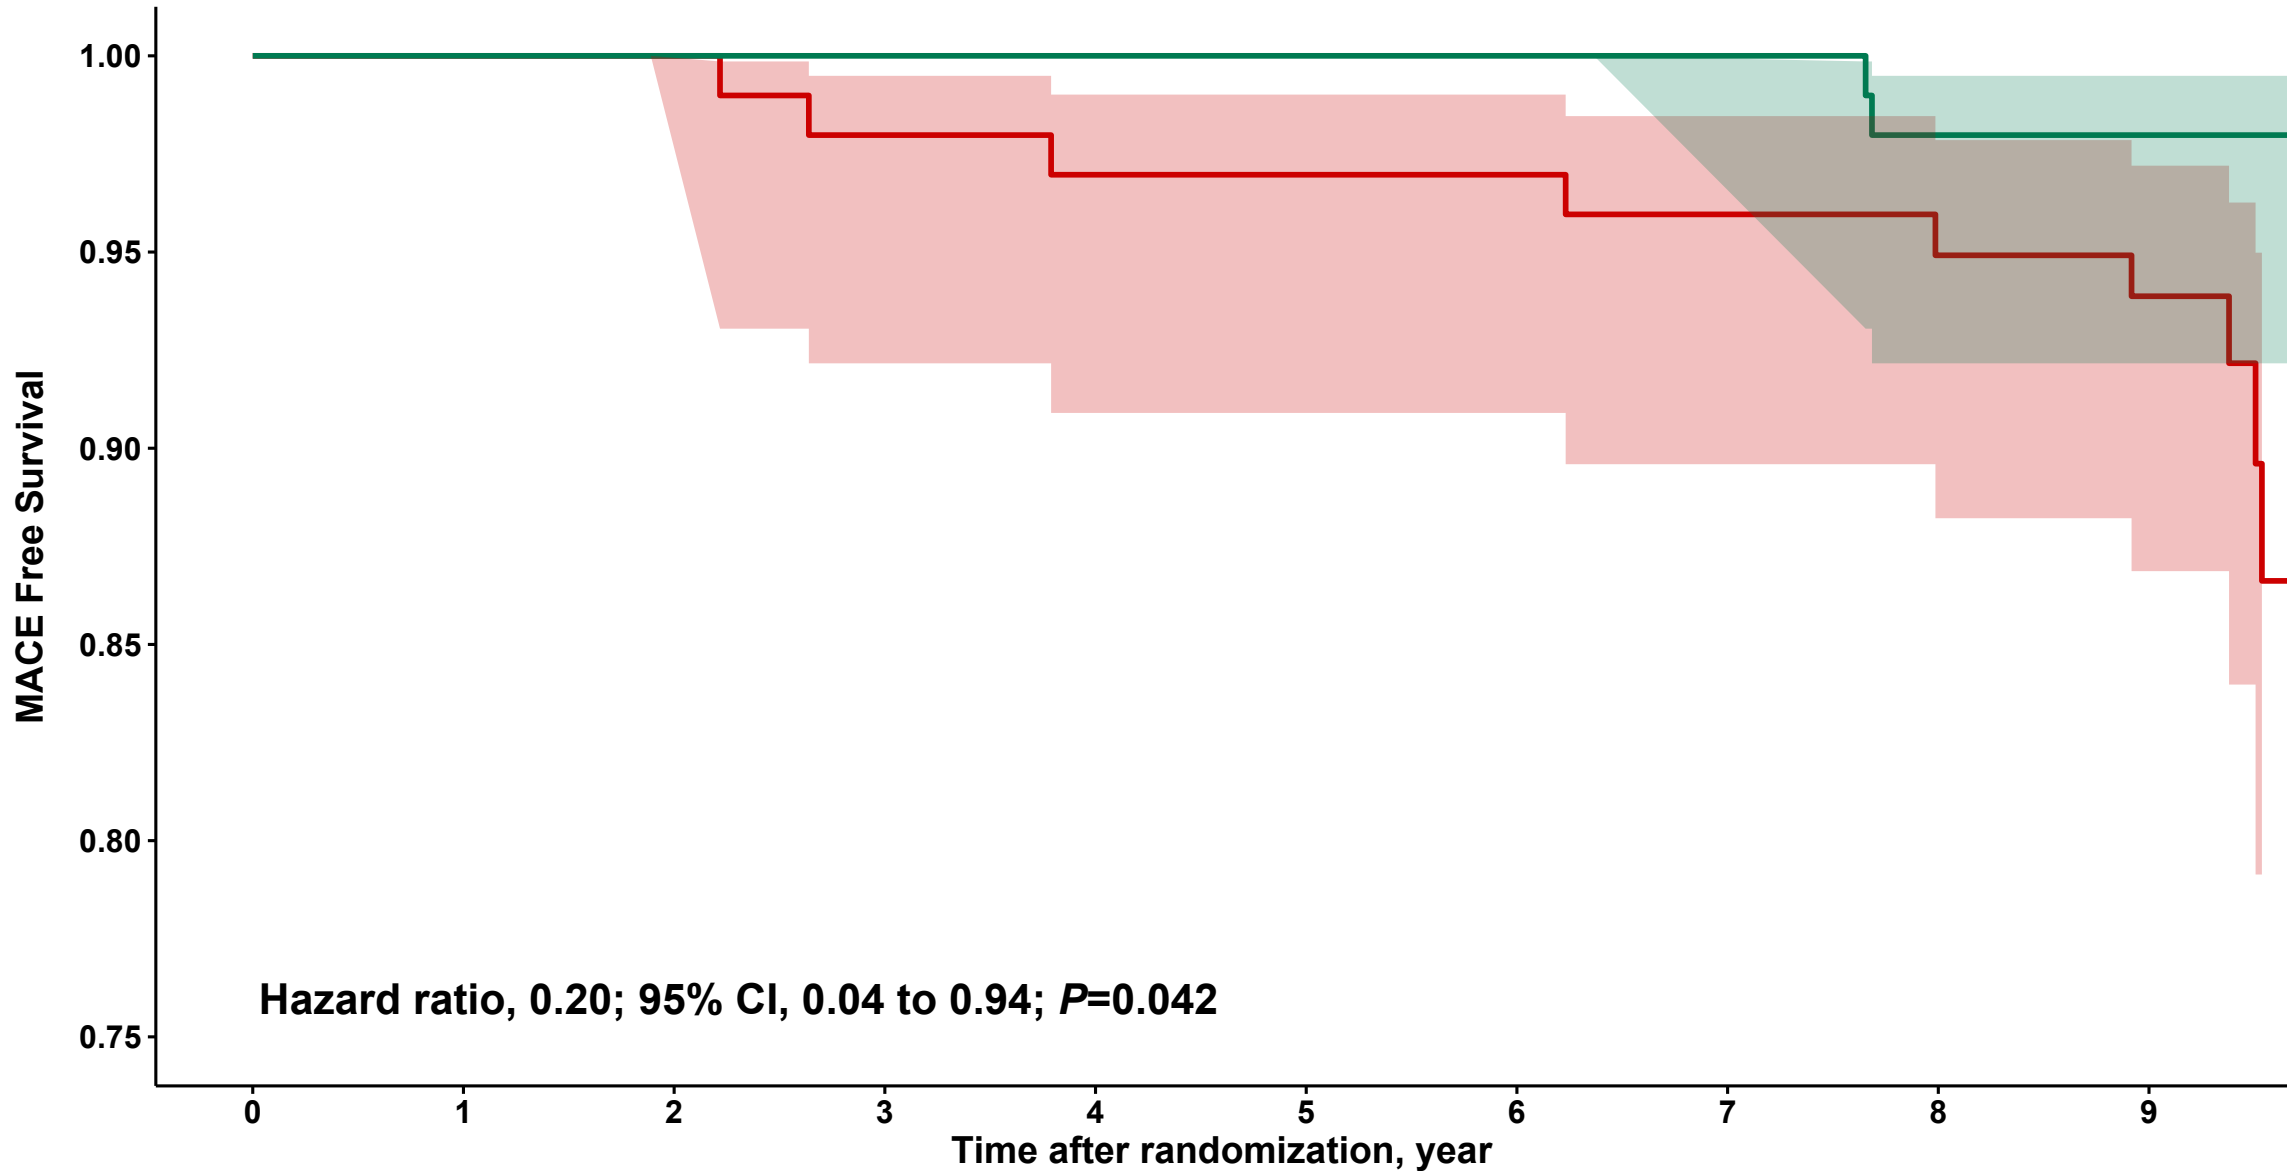

**Study groups:**

|                                                       | Number at risk |     |     |     |     |     |     |     |    |    |
|-------------------------------------------------------|----------------|-----|-----|-----|-----|-----|-----|-----|----|----|
|                                                       | 0              | 1   | 2   | 3   | 4   | 5   | 6   | 7   | 8  | 9  |
| <span style="color: red;">■</span> FRS <sub>g</sub>   | 100            | 100 | 99  | 97  | 96  | 96  | 96  | 94  | 91 | 89 |
| <span style="color: green;">■</span> IRS <sub>g</sub> | 103            | 103 | 103 | 103 | 103 | 103 | 103 | 101 | 97 | 91 |

**Time after randomization, year**

Study groups: FRS<sub>g</sub> IRS<sub>g</sub>

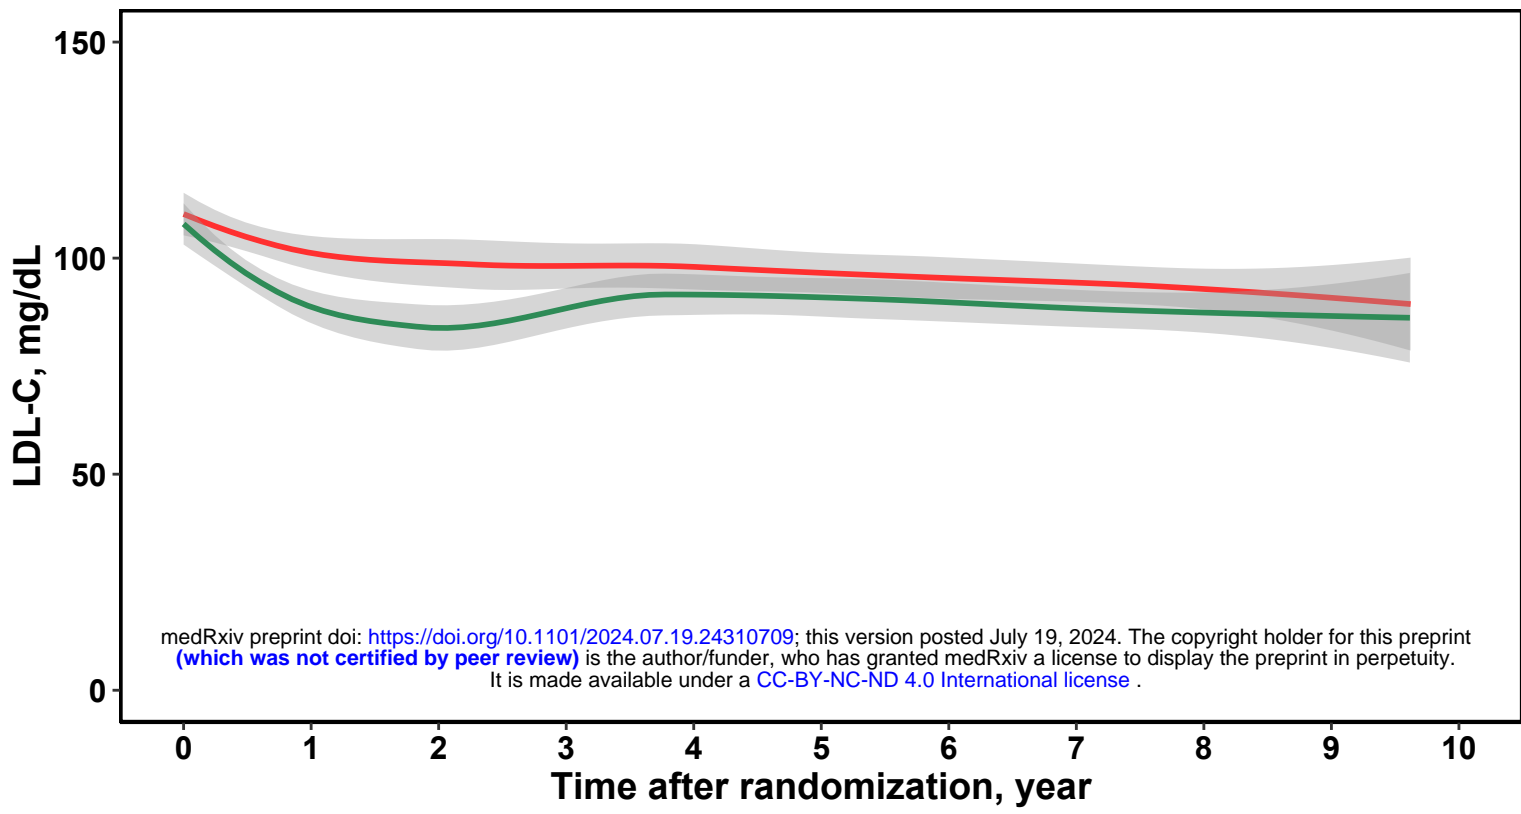

Study groups: FRS<sub>g</sub> IRS<sub>g</sub>

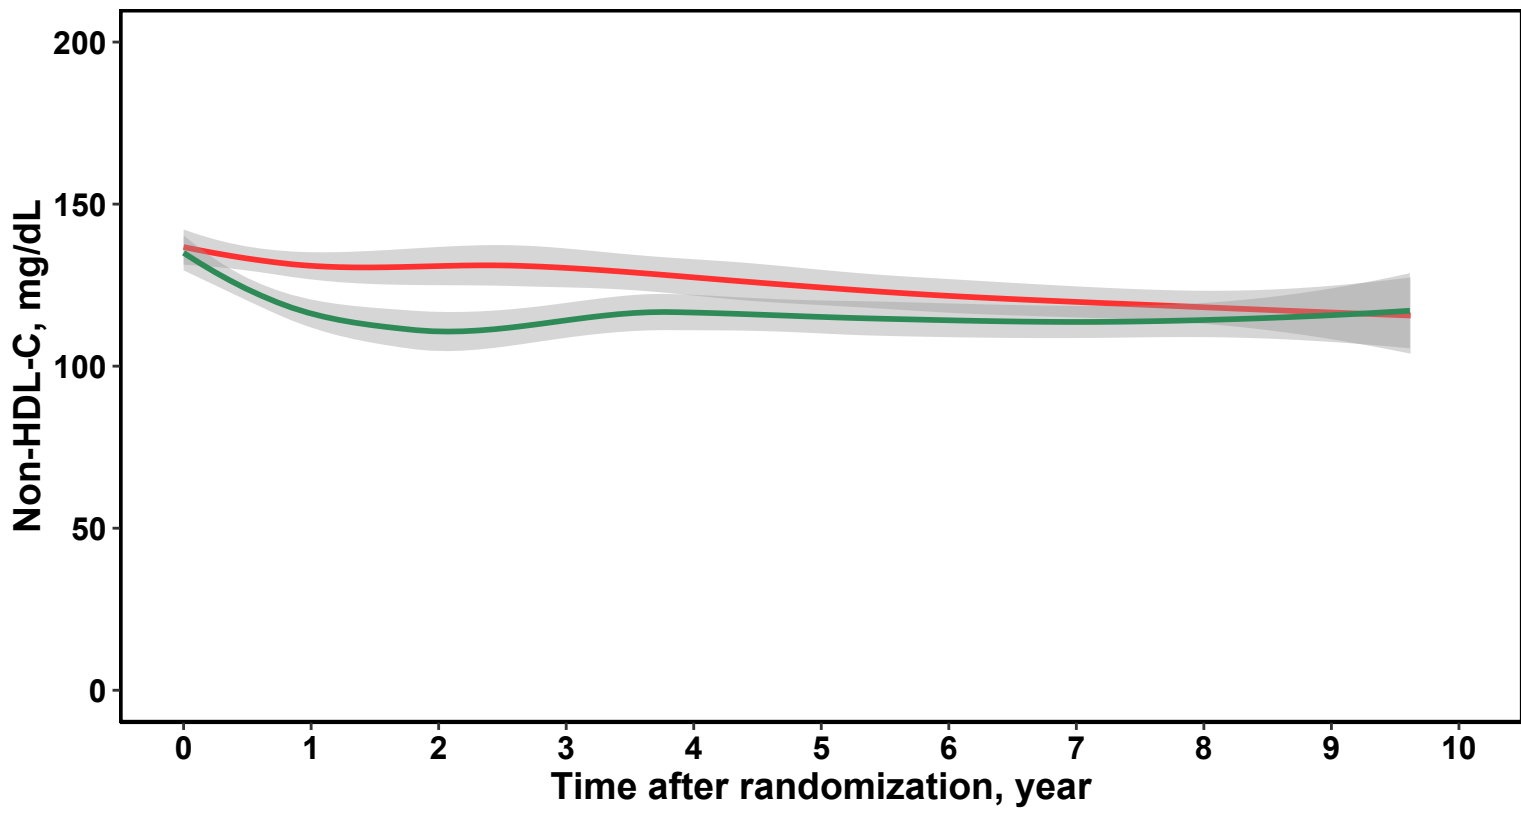

Study groups: FRS<sub>g</sub> IRS<sub>g</sub>

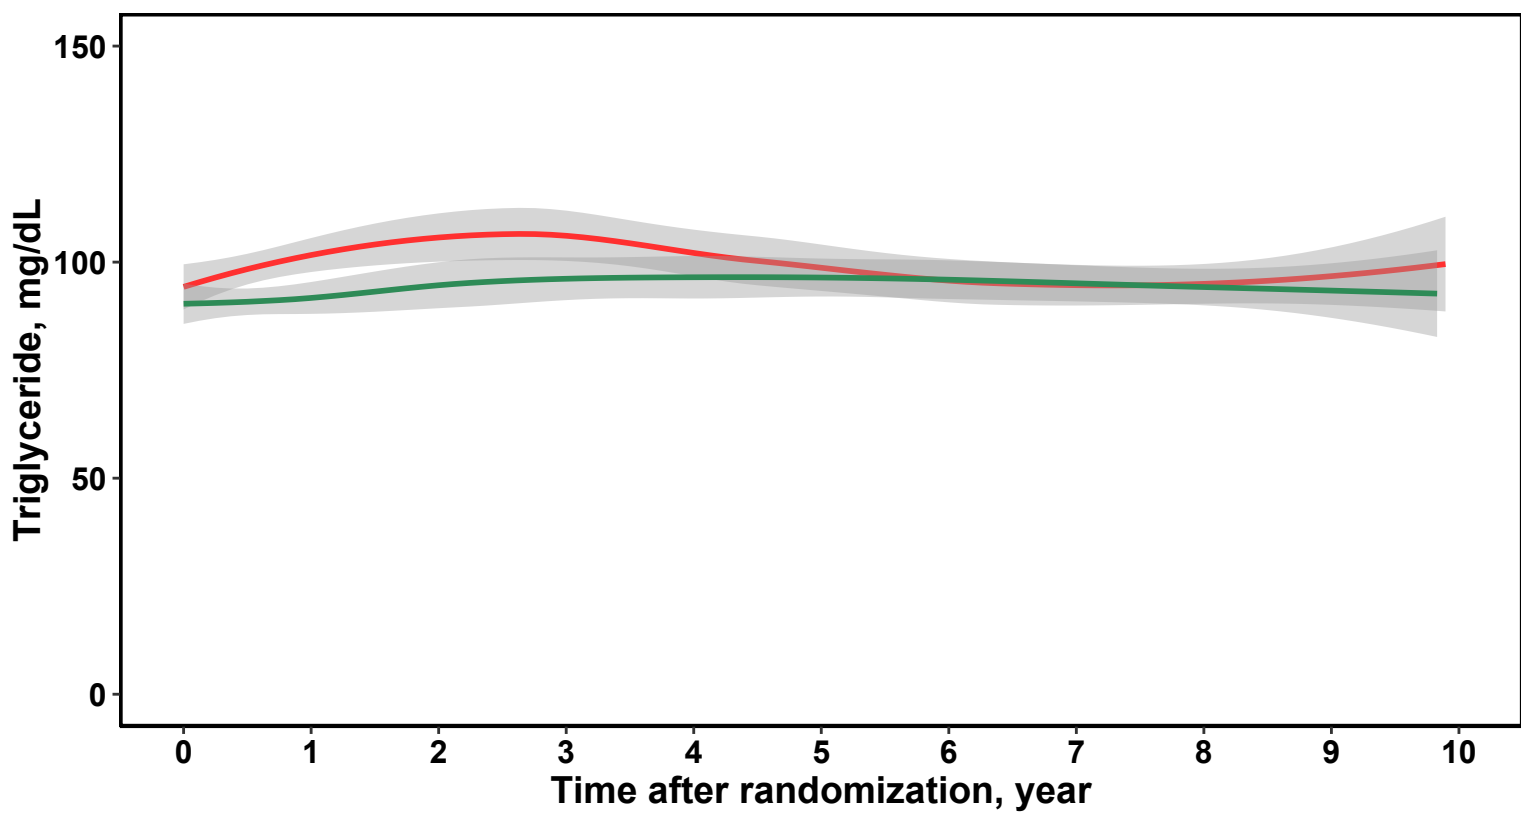

Study groups: **FRS<sub>g</sub>** **IRS<sub>g</sub>** Taking: **Any Types of Statins** **High-Intensity Statins** **Low-Intensity Statins** **Medium-Intensity Statins**

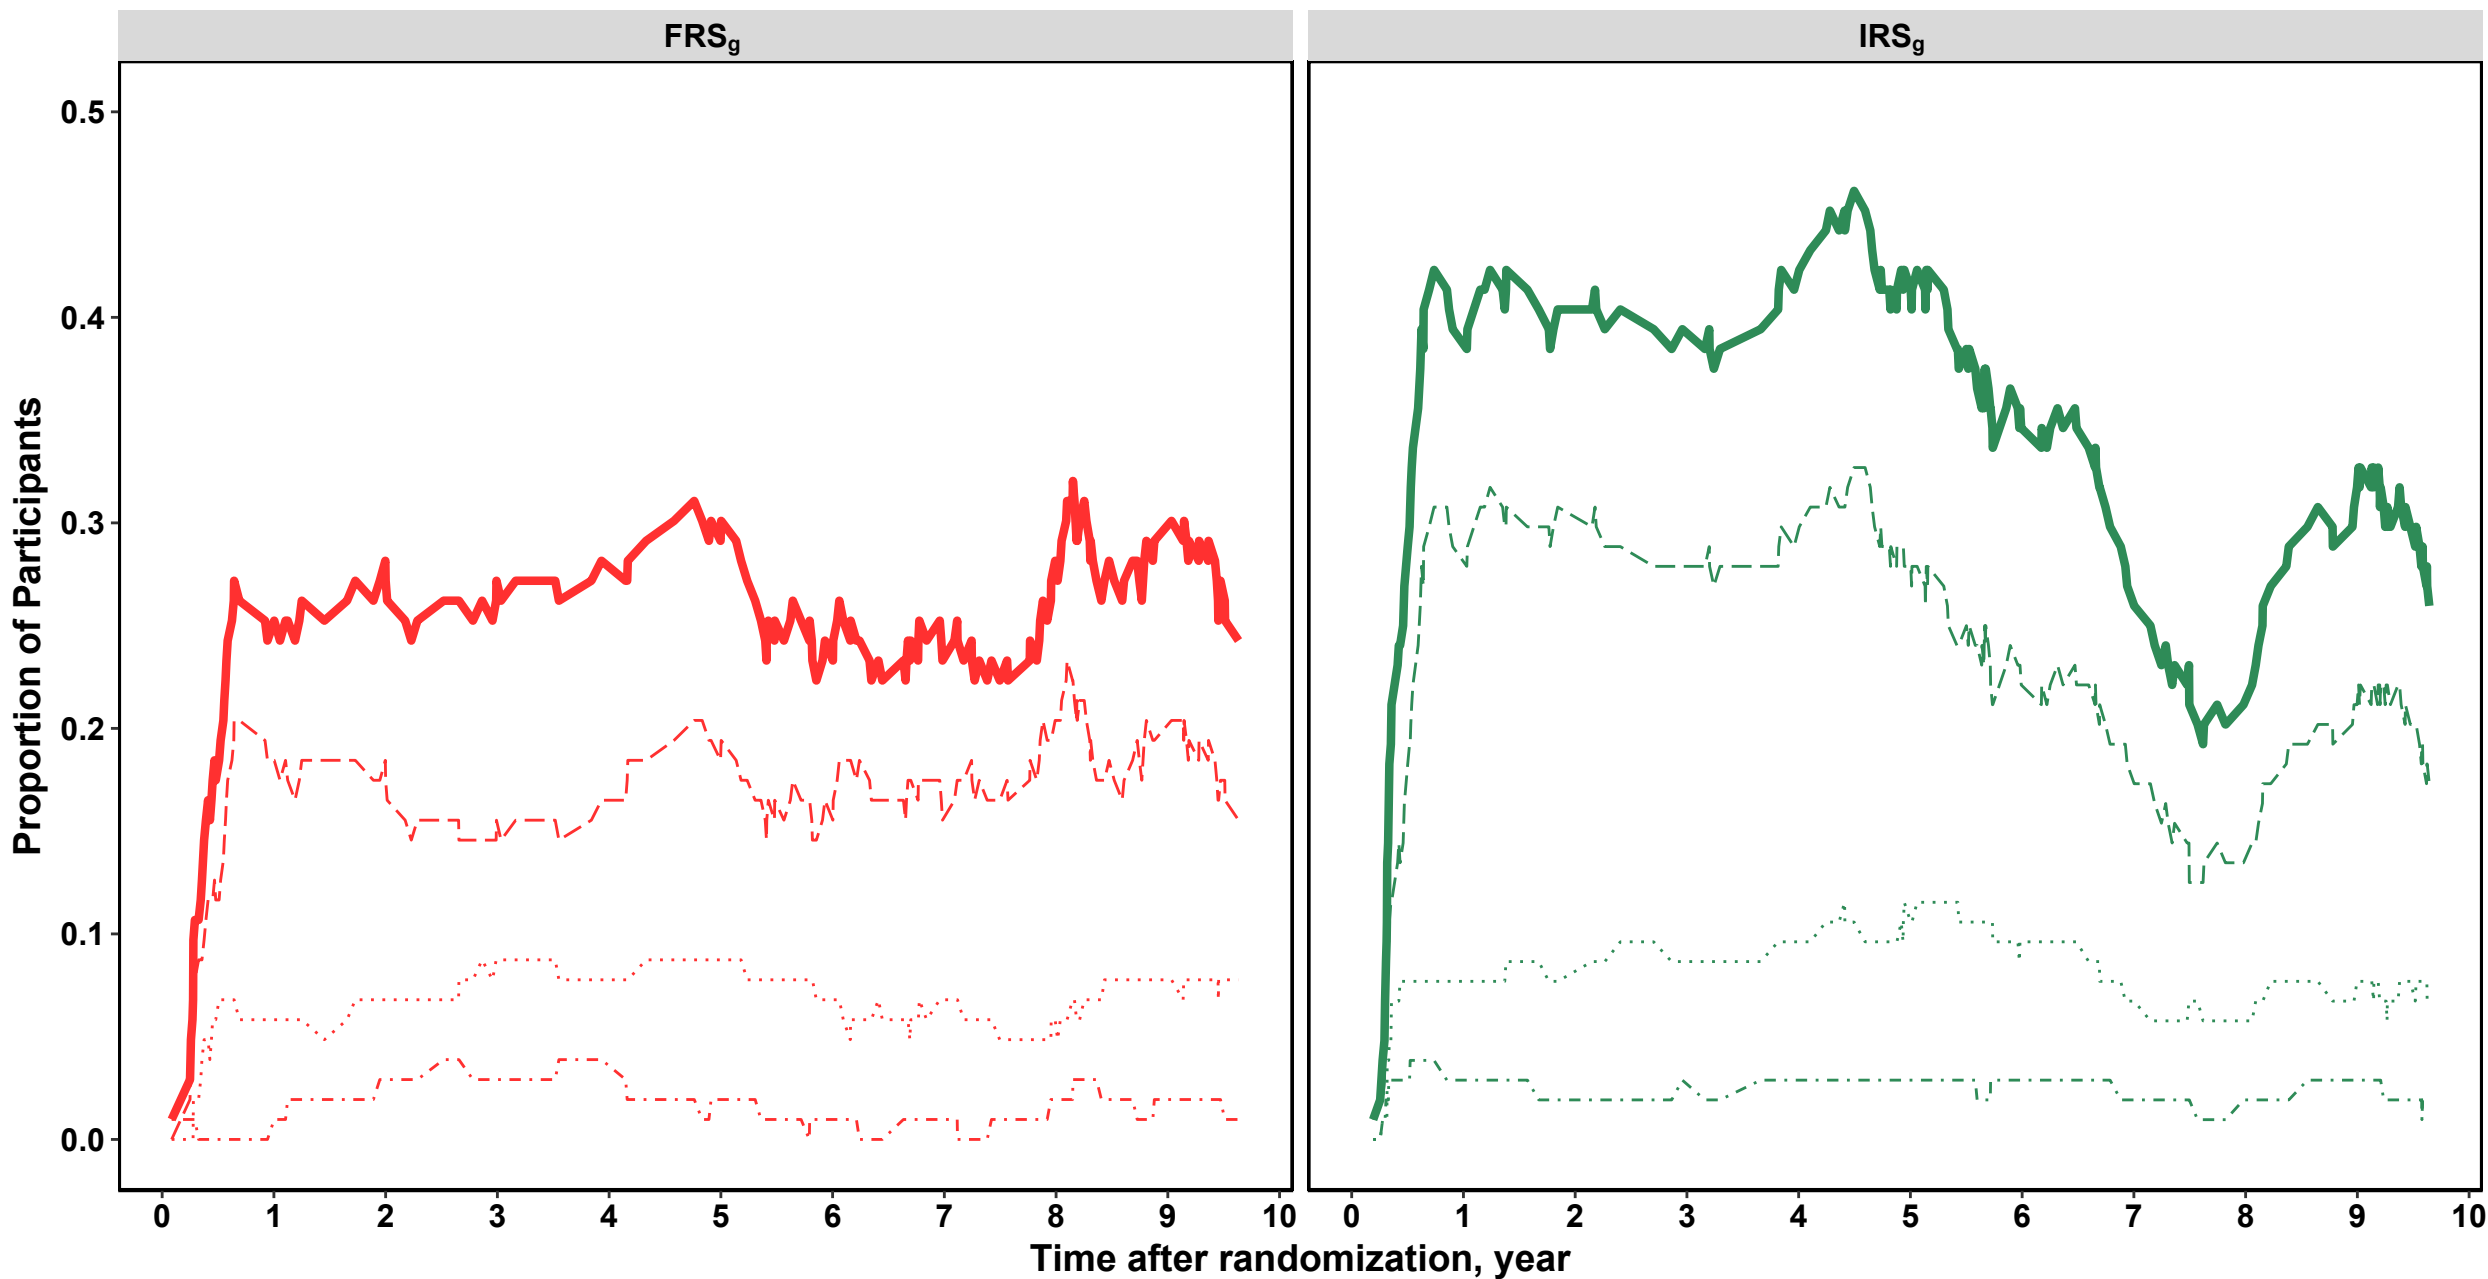

Source: https://medrxiv.org/content/10.1101/2024.07.19.24310709v1.full.pdf
